# Supplementary material for: Development and validation of a novel questionnaire to describe and assess sensations and triggers associated with refractory and unexplained chronic cough
Source: PubMed Central journal article supplement (PMC11331982; doi:10.1136/bmjresp-2024-002430), 2024-08-13

## Supplement

### Figure 1S: Sensations Provoking Cough Interview Guide for the TOPIC Study (Stage I)

The interview guide was developed following a literature review of studies exploring people’s experience and descriptions of cough and incorporating the experience of clinicians delivering local cough services.

| <u>Sensations Provoking Cough TOPIC Guide</u>                                                                                                                                                                                                                                                                                                                                                                                                                                                                                                                                                                                                                                                                                                                                                                                                                                                                                                                                                                       |
|---------------------------------------------------------------------------------------------------------------------------------------------------------------------------------------------------------------------------------------------------------------------------------------------------------------------------------------------------------------------------------------------------------------------------------------------------------------------------------------------------------------------------------------------------------------------------------------------------------------------------------------------------------------------------------------------------------------------------------------------------------------------------------------------------------------------------------------------------------------------------------------------------------------------------------------------------------------------------------------------------------------------|
| <ul style="list-style-type: none"> <li>• Do you feel an urge to cough?</li> <li>• How would you describe this feeling?</li> <li>• Do you produce any sputum? And if you do how much?</li> <li>• Is your urge to cough painful?</li> <li>• How intense is the urge to cough feeling?</li> <li>• Is the intensity or feeling of the urge to cough different in the day or night time?</li> <li>• How often do you get the urge to cough?</li> <li>• Does anything specific trigger your urge to cough?</li> <li>• If you get the urge to cough do you always cough afterwards?</li> <li>• Does coughing relieve the urge?</li> <li>• Does anything else relieve the urge to cough?</li> <li>• How does the urge to cough make you feel?</li> <li>• Where is the feeling of the urge to cough?               <ul style="list-style-type: none"> <li>○ Central, lateral, bilateral</li> <li>○ Localised or diffuse</li> </ul> </li> <li>• Is there anything else you would like to discuss about your cough?</li> </ul> |

### Table 1S: Key Descriptors of Cough Identified from Stage I of the TOPIC Study

Content analysis of the most frequently observed words or phrases from the audio transcripts of stage I participant interviews identified 18 key descriptors of cough across three themes: sensations, triggers, and secretions.

| Secretions | Triggers                   | Sensations      |
|------------|----------------------------|-----------------|
| Sputum     | Eating                     | Urge to Cough   |
| Phlegm     | Talking                    | Need to Cough   |
| Catarrh    | Lying Flat                 | Desire to Cough |
| Mucus      | Specific smells and odours | Tickle          |
| Spit       | Specific foods             | Irritation      |
|            |                            | Itch            |
|            |                            | Choking         |
|            |                            | Crackle         |

**Table 2S: Draft 'The triggers and sensations provoking cough (TOPIC)' Questionnaire.**

The 49 most frequent and articulated descriptions of cough sensations and triggers from Stage I and Stage II of the TOPIC Study compiled the draft TOPIC questionnaire.

### TRIGGERS

In this section of the questionnaire we would like you to think about different triggers for your cough. For each statement below, please tick the answer that best describes your recent experience of cough.

- 1) An irritation in my chest has triggered my cough
  - 2) An irritation in my throat triggers my cough
  - 3) A tickle in my throat triggers my cough
  - 4) There are no specific triggers for my cough
  - 5) My cough is unpredictable
  - 6) My cough is triggered by certain foods
  - 7) My cough is triggered by certain smells and odours
  - 8) Swallowing triggers my cough
  - 9) I cough after meals
  - 10) A change in air temperature triggers my cough
  - 11) Changes in the weather triggers my cough (e.g. changes in humidity)
  - 12) A high pollen count triggers my cough
  - 13) Poor air quality (e.g. pollution, smoky atmospheres) triggers my cough
  - 14) Lying flat makes me cough
  - 15) Exertion or exercise makes me cough
  - 16) Deep breathing makes me cough
  - 17) Breathlessness causes me to cough
  - 18) Phlegm (sputum) triggers my cough
  - 19) I cough because I need to clear my throat
  - 20) A dry throat triggers my cough
  - 21) My cough is triggered by talking on the telephone
  - 22) My cough is triggered by talking face to face with people I know
  - 23) My cough is triggered by talking face to face with unfamiliar people
  - 24) My cough is triggered by talking in a group situation
  - 25) Being anxious causes me to cough
-

26) Being anxious before talking (in social or formal situations) makes me cough

27) Laughing triggers my cough

28) Crying triggers my cough

29) Happy emotions trigger my cough (e.g. happiness, joy)

30) Sad emotions (e.g. sorrow, fear)

31) My cough is triggered by stressful situations

## SENSATIONS

In this section we would like you to think about the sensations you may experience when coughing and how this makes you feel. For each statement below, please tick the answer that best describes your recent experience of cough.

32) Coughing makes me feel like I'm choking

33) When I'm coughing I feel like I can't get my breath

34) I find my cough unpleasant

35) My cough is unpleasant for other people (e.g. socially, at work)

36) My cough makes me feel embarrassed

37) I find my cough annoying

38) My cough is annoying for others

39) My cough make me feel uncomfortable

40) I cough so violently that I retch

41) I cough so violently that I vomit

42) Coughing makes me breathless

43) Coughing prevents me from getting air into my lungs

44) Coughing makes me feel exhausted

45) My cough gives me a headache/pain in my head

46) Coughing causes me to feel pressure in my head

47) My chest feels like it tightens after coughing

48) Coughing causes muscular pain (e.g. back, neck, chest)

49) When I cough I cannot control it

**Table 3S: Reason for item removal for draft TOPIC Trigger items**

Floor effect was achieved when  $\geq 50.0\%$  of participants scored 0 or 1 and Ceiling effect was achieved when  $\geq 50.0\%$  of participant scored 4 or 5.

1  $\geq 50\%$  of RUCC participants

2  $\geq 50\%$  of COPD, Bronchiectasis, Asthma, ILD participants

3  $\geq 50\%$  of RUCC, COPD, Bronchiectasis, Asthma, ILD participants

Abbreviations COPD, chronic obstructive pulmonary disease; ILD, interstitial lung disease.

|                                | Draft TOPIC item                                                                      | Floor <sup>1</sup> | Ceiling <sup>2</sup> | Rasch     |
|--------------------------------|---------------------------------------------------------------------------------------|--------------------|----------------------|-----------|
| 1                              | An irritation in my chest has triggered my cough                                      | X <sup>1</sup>     |                      |           |
| 2                              | An irritation in my throat triggers my cough                                          |                    | x <sup>1</sup>       |           |
| 3                              | A tickle in my throat triggers my cough                                               |                    | x <sup>1</sup>       |           |
| 4                              | There are no specific triggers for my cough                                           | X <sup>3</sup>     |                      |           |
| 5                              | My cough is unpredictable                                                             |                    | x <sup>3</sup>       |           |
| 23                             | My cough is triggered by talking face to face with unfamiliar people                  | x <sup>3</sup>     |                      |           |
| 24                             | My cough is triggered by talking in a group situation                                 | x <sup>3</sup>     |                      |           |
| 25                             | Being anxious causes me to cough                                                      | x <sup>3</sup>     |                      |           |
| 26                             | Being anxious before talking (in social or formal situations) makes me cough          | x <sup>3</sup>     |                      |           |
| 27                             | Laughing triggers my cough                                                            | x <sup>3</sup>     |                      |           |
| 28                             | Crying triggers my cough                                                              | x <sup>3</sup>     |                      |           |
| 29                             | Happy emotions trigger my cough (e.g. happiness, joy)                                 | x <sup>3</sup>     |                      |           |
| 30                             | Sad emotions (e.g. sorrow, fear)                                                      | x <sup>3</sup>     |                      |           |
| 6                              | My cough is triggered by certain foods                                                |                    |                      |           |
| 7                              | My cough is triggered by certain smells and odours                                    |                    |                      |           |
| 8                              | Swallowing triggers my cough                                                          |                    |                      |           |
| 9                              | I cough after meals                                                                   |                    |                      |           |
| 10                             | A change in air temperature triggers my cough                                         |                    |                      | x         |
| 11                             | Changes in the weather triggers my cough (e.g. changes in humidity)                   |                    |                      | x         |
| 12                             | A high pollen count triggers my cough                                                 |                    |                      | x         |
| 13                             | Poor air quality (e.g. pollution, smoky atmospheres) triggers my cough                |                    |                      | x         |
| 14                             | Lying flat makes me cough                                                             |                    |                      | x         |
| 15                             | Exertion or exercise makes me cough                                                   |                    |                      | x         |
| 16                             | Deep breathing makes me cough                                                         |                    |                      | x         |
| 17                             | Breathlessness causes me to cough                                                     |                    |                      | x         |
| 18                             | Phlegm (sputum) triggers my cough                                                     |                    |                      | x         |
| 19                             | I cough because I need to clear my throat                                             |                    |                      |           |
| 20                             | A dry throat triggers my cough                                                        |                    |                      |           |
| 21                             | My cough is triggered by talking on the telephone                                     |                    |                      |           |
| 22                             | My cough is triggered by talking face to face with people I know (changed to talking) |                    |                      |           |
| 31                             | My cough is triggered by stressful situations                                         |                    |                      | x         |
| <b>Number of items removed</b> |                                                                                       | <b>10</b>          | <b>3</b>             | <b>10</b> |

**Table 4S: Reason for item removal for Draft TOPIC Sensation items.**

Floor effect was achieved when  $\geq 50.0\%$  of participants scored 0 or 1 and Ceiling effect was achieved when  $\geq 50.0\%$  of participant scored 4 or 5.

1  $\geq 50\%$  of RUCC participants

2  $\geq 50\%$  of COPD, Bronchiectasis, Asthma, ILD participants

3  $\geq 50\%$  of RUCC, COPD, Bronchiectasis, Asthma, ILD participants

|                                | Draft TOPIC Item                                                 | Floor          | Ceiling        | Rasch    |
|--------------------------------|------------------------------------------------------------------|----------------|----------------|----------|
| 34                             | My cough is unpleasant                                           |                | X <sup>3</sup> |          |
| 35                             | My cough is unpleasant for other people (e.g. socially, at work) |                | x <sup>1</sup> |          |
| 38                             | My cough is annoying for others                                  |                | x <sup>3</sup> |          |
| 39                             | My cough make me feel uncomfortable                              |                | X <sup>3</sup> |          |
| 41                             | I cough so violently that I vomit                                | x <sup>3</sup> |                |          |
| 32                             | coughing makes me feel like I'm choking                          |                |                |          |
| 33                             | When I'm coughing I feel like I can't get my breath              |                |                | x        |
| 36                             | My cough makes me feel embarrassed                               |                |                |          |
| 37                             | I find my cough annoying                                         |                |                |          |
| 40                             | I cough so violently that I retch/vomit                          |                |                |          |
| 42                             | Coughing makes me breathless                                     |                |                | x        |
| 43                             | Coughing prevents me from getting air into my lungs              |                |                | x        |
| 44                             | Coughing makes me feel exhausted                                 |                |                | x        |
| 45                             | My cough gives me a headache/ muscular pain                      |                |                |          |
| 46                             | Coughing causes me to feel pressure in my head                   |                |                |          |
| 47                             | My chest feels like it tightens after coughing                   |                |                | x        |
| 48                             | Coughing causes muscular pain (e.g. back, neck, chest)           |                |                | x        |
| 49                             | When I cough I cannot control it                                 |                |                |          |
| <b>Number of items removed</b> |                                                                  | <b>1</b>       | <b>4</b>       | <b>6</b> |

**Table 5S Eigen values from the Principal Component Analyses**

Extraction Method: Principal Axis Factoring. Rotation Method: Varimax with Kaiser Normalization.

<sup>a</sup>Rotation converged in 9 iterations

**Rotated Factor Matrix<sup>a</sup>**

| TOPIC Items                                                          | Factor                                 |                                  |                           |                                     |
|----------------------------------------------------------------------|----------------------------------------|----------------------------------|---------------------------|-------------------------------------|
|                                                                      | Talking triggers and Frustrations<br>1 | Food and Olfactory Triggers<br>2 | Distressing Symptoms<br>3 | Sensations related to the head<br>4 |
| Q15) When I cough I cannot control it                                | .650                                   |                                  |                           |                                     |
| Q11) I find my cough annoying                                        | .644                                   |                                  |                           |                                     |
| Q7) My cough is triggered by talking on the telephone                | .639                                   |                                  |                           |                                     |
| Q8) My cough is triggered by talking face to face with people I know | .513                                   |                                  |                           |                                     |
| Q1) My cough is triggered by certain foods                           |                                        | .837                             |                           |                                     |
| Q4) I cough after meals                                              |                                        | .603                             |                           |                                     |
| Q3) Swallowing triggers my cough                                     |                                        | .501                             |                           |                                     |
| Q2) My cough is triggered by certain smells and odours               |                                        | .541                             | .621                      |                                     |
| Q12) I cough so violently that I retch                               |                                        |                                  | .647                      |                                     |
| Q9) Coughing makes me feel like I'm choking                          |                                        |                                  | .627                      |                                     |
| Q10) My cough makes me feel embarrassed                              | .526                                   |                                  | .555                      |                                     |
| Q14) Coughing causes me to feel pressure in my head                  |                                        |                                  |                           | .885                                |
| Q13) My cough gives me a headache/pain in my head                    |                                        |                                  |                           | .885                                |
| Q5) I cough because I need to clear my throat                        |                                        |                                  |                           |                                     |
| Q6) A dry throat triggers my cough                                   |                                        |                                  |                           |                                     |

**Figure 2S Scatterplot of Total TOPIC Scores and total SGRQ scores.** Abbreviations Bronc, bronchiectasis; COPD, chronic obstructive pulmonary disease; ILD, interstitial lung disease; RUCC, refractory or unexplained chronic cough; SGRQ, St. George's Respiratory Questionnaire.

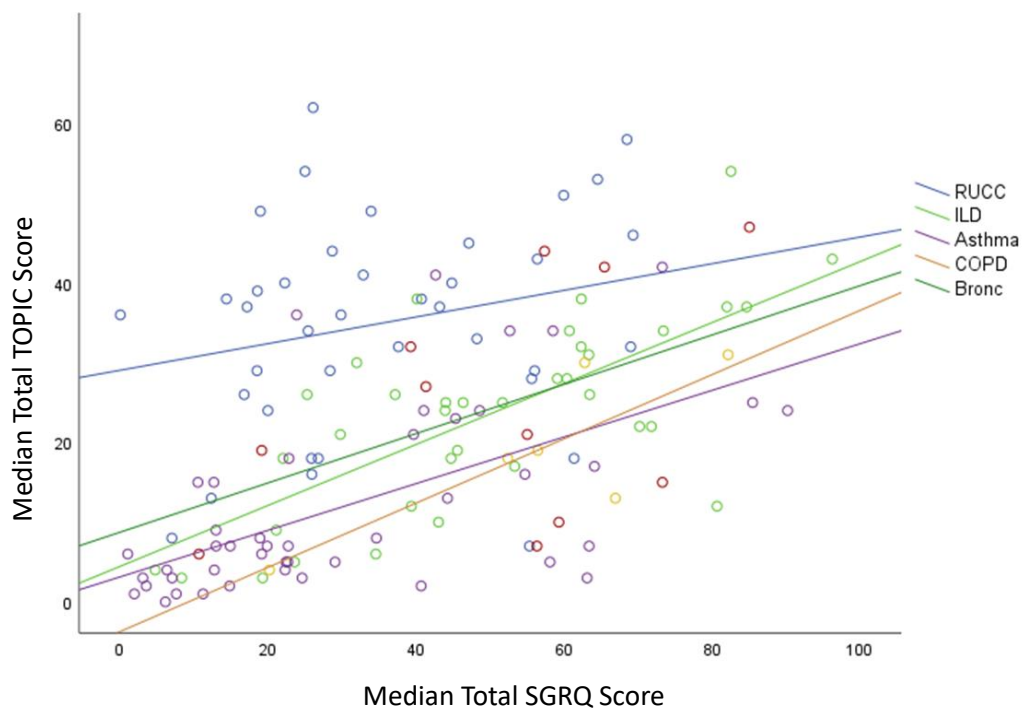

Supplement: bmjresp-11-1-s001.pdf [file bmjresp-11-1-s001.pdf]
